# Supplementary material for: Fabrication of S/CoS2/NiS2/PZH composite using hydrothermal technology for high-performance supercapacitors
Source: Royal Society of Chemistry journal article supplement (doi:10.1039/d3nj04264b), 2024-01-01
Supplement: d3nj04264b1.pdf [file d3nj04264b1.pdf]

## **Fabrication of S/CoS<sub>2</sub>/NiS<sub>2</sub>/PZH composite using hydrothermal technology for high-performance supercapacitors**

Ya Yuan Zhang,<sup>†a</sup> Yan Xue Xue,<sup>†a</sup> Fei Fei Dai,<sup>a</sup> Ding Ling Gao,<sup>a</sup> Yu Xiang Liu,<sup>a</sup> Na Qin,<sup>a</sup> Jian Hua Chen<sup>ab</sup> and Qian Yang<sup>\*ab</sup>

<sup>a</sup> College of Chemistry, Chemical Engineering and Environment, Minnan Normal University, Zhangzhou 363000, P. R. China.

<sup>b</sup> Fujian Province University Key Laboratory of Modern Analytical Science and Separation Technology, Minnan Normal University, Zhangzhou 363000, P. R. China.

\*Corresponding author:

E-mail addresses: yangqian0417@163.com (Q. Yang).

















**Table S1** The equivalent internal resistance ( $R_s$ ) and the charge-transfer resistance ( $R_{ct}$ ) of PZH, S/CoS<sub>2</sub>/NiS<sub>2</sub>, S/CoS<sub>2</sub>/NiS<sub>2</sub>/PZH-30.

| Sample                                       | $R_{ct}$ ( $\Omega$ ) | $R_s$ ( $\Omega$ ) |
|----------------------------------------------|-----------------------|--------------------|
| PZH                                          | 1.620                 | 0.7093             |
| S/CoS <sub>2</sub> /NiS <sub>2</sub>         | 1.259                 | 0.7051             |
| S/CoS <sub>2</sub> /NiS <sub>2</sub> /PZH-30 | 0.408                 | 0.695              |
